# Superantigens Increase the Survival of Mice Bearing T Cell Lymphomas by Inducing Apoptosis of Neoplastic Cells

Juliana Mundiñano<sup>1</sup>, Paula M. Berguer<sup>2</sup>, Gabriel Cabrera<sup>1</sup>, Daniela Lorenzo<sup>1</sup>, Irene Nepomnaschy<sup>1,9</sup>, Isabel Piazzon<sup>1\*,9</sup>

**1** ILEX-CONICET, División Medicina Experimental, Instituto de Investigaciones Hematológicas, Academia Nacional de Medicina, Buenos Aires, Argentina, **2** Consejo Nacional de Investigaciones Científicas y Técnicas, Fundación Instituto Leloir, Buenos Aires, Argentina

## Abstract

Superantigens bind to major histocompatibility complex class II molecules and interact with T cells expressing a particular T cell receptor V $\beta$  inducing a strong proliferation/deletion response of the superantigen-reactive T cells. However, there have been no attempts to investigate the ability of Sags to induce apoptosis in neoplastic T cells by signaling through the V $\beta$  region of their TCR. In the present study we show that bacterial and MMTV-encoded superantigens induce the apoptosis of AKR/J cognate lymphoma T cells both *in vitro* and *in vivo*. The Fas-Fas-L pathway was shown to be involved in the apoptosis of lymphoma T cells induced by bacterial superantigens. *In vivo* exposure to bacterial superantigens was able to improve the survival of lymphoma bearing mice. Moreover, the permanent expression of a retroviral encoded superantigen induced the complete remission of an aggressive lymphoma in a high percentage of mice. The possibility of a therapeutic use of superantigens in lymphoma/leukemia T cell malignancies is discussed.

**Citation:** Mundiñano J, Berguer PM, Cabrera G, Lorenzo D, Nepomnaschy I, et al. (2010) Superantigens Increase the Survival of Mice Bearing T Cell Lymphomas by Inducing Apoptosis of Neoplastic Cells. PLoS ONE 5(12): e15694. doi:10.1371/journal.pone.0015694

**Editor:** Syed A. Aziz, Health Canada, Canada

**Received:** November 1, 2010; **Accepted:** November 23, 2010; **Published:** December 22, 2010

**Copyright:** © 2010 Mundiñano et al. This is an open-access article distributed under the terms of the Creative Commons Attribution License, which permits unrestricted use, distribution, and reproduction in any medium, provided the original author and source are credited.

**Funding:** This work was supported by Agencia Nacional de Promoción Científica y Tecnológica PICT 506305, Consejo Nacional de Investigaciones Científicas y Técnicas PIP 20080102494, FUNDALEU, and Fundación A. J. Roemmers. The funders had no role in study design, data collection and analysis, decision to publish, or preparation of the manuscript.

**Competing Interests:** The authors have declared that no competing interests exist.

\* E-mail: ipiazzon@hematologia.anm.edu.ar

<sup>9</sup> These authors contributed equally to this work.

## Introduction

Superantigens (Sags) are bacterial and viral proteins that share the ability to activate a large number of normal T cells. Sags bind to major histocompatibility complex (MHC) class II molecules as unprocessed proteins and subsequently interact with a high number of T cells expressing particular T cell receptor (TCR) V $\beta$  chains [1–4]. After several rounds of proliferation, Sag reactive T cells undergo apoptosis or become anergic [2–4].

Bacterial Sags are a well described family of secreted protein toxins produced mainly by *Staphylococcus aureus* and *Streptococcus pyogenes* [5]. The capacity of bacterial Sags to induce the activation and deletion of T cells expressing T cell receptors (TCR) with a specific subset of TCR  $\beta$ -chain variable (V $\beta$ ) regions in mice has been extensively studied [2–3]. For instance, in mice, the staphylococcal enterotoxins (SEs) A and E engage T cell receptors bearing V $\beta$  3, 7, and 17, albeit with different avidities. SEB and its close sequence relatives, SECs 1–3, share reactivity with T cells bearing members of the mouse V $\beta$  3, 7 and 8.1–3 family [6–7]. We have recently described that SEI significantly stimulates mouse T cells bearing V $\beta$  3, 5 and 13 [8].

Mouse mammary tumor virus (MMTV) is a type B retrovirus which induces mammary adenocarcinomas in mice [9–10]. MMTV has two routes of infection in mice; susceptible strains acquire the virus through milk-borne infection, while other strains

inherit endogenous copies of the provirus (Mtv). For a review, see Simpson E [11]. Mtv are present in the germline of most of the inbred mice and there are multiple proviral sequences found at different chromosomal locations in different mouse strains. Although the majority of these endogenous proviral sequences do not produce viral particles because of mutations in their regulatory or coding regions, all of them express a Sag which is encoded in their LTR region [12–13]. Different exogenous and endogenous proviruses cause the deletion of different classes of V $\beta$ -bearing T cells, because they encode Sag proteins with different C-terminal aminoacid sequences [14–16]. We have described two variants of exogenous MMTVs, termed MMTV BALB14 and MMTV BALB2. The former encodes for a Sag which is specifically recognized by T cells bearing the V $\beta$ 14 region; MMTV BALB2 encodes for a Sag which contacts with V $\beta$ 2+ T cells [16–17].

Sags [18–20] and targeted Sags [21–28] have been used to enhance immunogenicity of murine and human tumor cells in different experimental models, mostly by fusing the Fab region of tumor-reactive monoclonal antibodies with mutated SEA or SEB. However, there have been no attempts to investigate the ability of Sags to induce apoptosis in neoplastic T cells by signaling through the V $\beta$  region of their TCR.

In the present study we show that MMTV-encoded and bacterial Sags are able to induce both *in vitro* and *in vivo* the apoptosis of AKR/J spontaneous lymphoma T cells expressing

cognate TCR V $\beta$  chains. Remarkably, we show that *in vivo* exposure to Sags is able to significantly improve the survival of mice bearing cognate lymphoma T cells.

## Materials and Methods

### Mice and lymphomas

Male and female AKR/J mice bred in our animal facilities (ILEX-CONICET, División Medicina Experimental, Instituto de Investigaciones Hematológicas, Academia Nacional de Medicina) were maintained untreated until they developed spontaneous T cell lymphomas at >6 months of age. Mice were sacrificed when thymus enlargement was evident. One- to 3-mo-old male and female AKR/J mice were used as hosts of sex-matched lymphoma cells or as donors of splenocytes or macrophages. Two- to 14-mo-old AKR/J mice without thymus enlargement nor a skewed TCRV $\beta$  repertory were used to determine the level of expression of Fas, Fas-L and Bcl-2 molecules on thymocytes by fluorescence-activated cell sorting (FACS).

The mice were housed according to the policies of the ILEX-CONICET, Academia Nacional de Medicina based on *Guide for Care and Use of Laboratory Animals*. Bethesda, MD: National Institutes of Health; 1985. NIH publication N.85-23.

All experiments were approved by the ethical committee of the ILEX-CONICET (Permit number 1008).

Lymphomas were characterized by FACS in order to determine the expression of CD4, CD8, the TCR $\beta$  chain and the V $\beta$  region, Fas, Fas-L and Bcl-2. Lymphoma cells were maintained by intraperitoneal passages in AKR/J mice. All lymphomas maintained their phenotype. Four T cell lymphomas expressing the V $\beta$  region in >95% of the cells were chosen to investigate their reactivity to Sags: 1) T14, bearing the V $\beta$ 14 region and expressing both CD4 and CD8 molecules; 2) T8, reactive with anti-V $\beta$ 8.1,8.2 monoclonal antibody (MoAb) and expressing both CD4 and CD8 molecules; 3) T8.2, reactive with anti-V $\beta$ 8.1,8.2 MoAb and expressing the CD4 co-receptor and 4) T5, a CD4+ lymphoma expressing the V $\beta$ 5 region.

### Monoclonal antibodies

The following MoAbs conjugated to fluorescein isothiocyanate (FITC), phycoerythrin (PE) or Cy-chrome 5 (all from Pharmingen) were used for FACS analysis: anti-CD4 (clone H129.19); anti-CD8a (clone 53-6.7), anti-TCR $\beta$  (clone H57-597), anti-V $\beta$ 14 (clone 14-2), anti-V $\beta$ 17<sup>a</sup> (clone KJ23), anti-V $\beta$ 13 (clone MR12-3), anti-V $\beta$ 12 (clone MR11-1), anti-V $\beta$ 11 (clone RR3-15), anti-V $\beta$ 10b (clone B21.5), anti-V $\beta$ 9 (MR10-2), anti-V $\beta$ 8.3 (clone 1B3.3), anti-V $\beta$ 8.1,8.2 (clone MR5-2), anti-V $\beta$ 7 (clone TR310), anti-V $\beta$ 6 (clone RR4-7), anti-V $\beta$ 5.1,5.2 (clone MR9-4), anti-V $\beta$ 4 (clone KT4), anti-V $\beta$ 3 (clone KJ25) or anti-V $\beta$ 2 (clone B20.6), anti-Fas (CD95 clone Jo2) and anti-Fas-L (CD178, clone MFL3). Intracellular staining of Bcl-2 was performed using FITC- or PE-conjugated anti-Bcl-2 (clone 3F11) and the Cytofix/Cytoperm kit (both from Pharmingen) according to the manufacturer's protocol.

### Flow cytometric staining

For double or triple staining,  $1 \times 10^6$  cells were incubated with the appropriate MoAbs as previously described [29]. Acquisition of 30,000 cells was performed using a FACScan flow cytometer (BD Biosciences). Results were analyzed using Cell Quest software (BD Immunocytometry Systems).

### Toxins and MMTV infection

Purified staphylococcal enterotoxin B (SEB) and E (SEE) were purchased from Toxin Technologies. Staphylococcal enterotoxin I

(SEI) was a kind gift from Dr. E. Malchiodi. The toxins were diluted in PBS and kept frozen in aliquots at  $-20^\circ\text{C}$  until use.

AKR/J mice were infected with MMTV BALB2 or MMTV BALB14 by footpad injection of 50  $\mu\text{l}$  of virus-containing milk, as previously described [16]. Non-infected control mice were footpad inoculated with 50  $\mu\text{l}$  of virus-free milk.

### Cultures

Different numbers of lymphoma cells were co-cultured with mytomycin-C pretreated splenocytes from MMTV-infected or non-infected AKR/J mice. Alternatively, lymphoma cells were co-cultured with intra-peritoneal macrophages obtained from thio-glycolate-injected young AKR/J mice in the presence of 10  $\mu\text{g}/\text{ml}$  of SEB, SEE, SEI or PBS. All cultures were performed in 96-well flat-bottom microculture plates (Corning Costar) in RPMI 1640 (Invitrogen Life Technologies) supplemented with 10% fetal bovine serum, 1% L-glutamine, 1% antibiotic-antimycotic and 50  $\mu\text{M}$  2-mercaptoethanol (Gibco, Invitrogen Life Technologies) and incubated in humidified 5%  $\text{CO}_2$  atmosphere at  $37^\circ\text{C}$ .

### Proliferation assays

The *in vitro* proliferative response of lymphoma cells to Sags was determined by the incorporation of 3H-thymidine (PerkinElmer) into DNA. Lymphoma cells were co-cultured with MMTV infected splenocytes or with macrophages exposed to bacterial Sags. At 24 hours of culture, cells were pulsed with 1  $\mu\text{Ci}$  of 3H-thymidine and 18 hours later were harvested on a glass fiber filter. Samples were counted in a scintillation beta-counter (Becton Dickinson).

Additionally, lymphoma cells were labelled using 5,6 carboxy-fluorescein diacetate succinimidyl ester (CFSE) (Molecular Probes) and cultured with Sags. After 48 hours, cells were recovered and proliferation was analyzed by CFSE dilution [30].

For *in vivo* proliferation assays, CFSE-stained lymphoma cells were intraperitoneally inoculated in AKR/J mice. One hour later mice received intraperitoneally 25  $\mu\text{g}$  of SEB, SEI, SEE or PBS. Alternatively, CFSE-stained lymphoma cells were intraperitoneally inoculated in MMTV-infected and non-infected AKR/J mice. At different time intervals, cells were recovered from the intraperitoneal cavity and analyzed by FACS.

### Apoptosis assays

Lymphoma cells were cultured with 10  $\mu\text{g}/\text{ml}$  of SEB, SEI, SEE or PBS. At different time intervals, cells were recovered, washed with PBS at  $4^\circ\text{C}$ , resuspended in 150  $\mu\text{l}$  of Annexin V Binding Buffer and stained with 1  $\mu\text{l}$  of Annexin V and 1  $\mu\text{l}$  of 7AAD (all from Pharmingen). For DNA content analysis, propidium iodide (PI) (Sigma) was used as described previously [29].

For *in vivo* apoptosis assays, CFSE-stained lymphoma cells were intraperitoneally inoculated in AKR/J mice and one hour later mice received intraperitoneally 25  $\mu\text{g}$  of SEB, SEI, SEE or PBS. Alternatively, CFSE-stained lymphoma cells were intraperitoneally inoculated in MMTV infected and non-infected AKR/J mice. Forty eight hours later cells were recovered from the intraperitoneal cavity and stained with Annexin V.

Additionally, lymphoma cells were injected in the footpad and 3 to 6 days later, 10  $\mu\text{g}$  of bacterial Sags or PBS were footpad inoculated. Twenty four hours later, the draining popliteal lymph nodes (PLN) were excised and apoptosis was assessed by FACS using PI or by histology using the terminal deoxynucleotidyl transferase (TdT)-mediated dUTP nick-end labelling (TUNEL) assay. TUNEL was performed using the ApoptTag In Situ Apoptosis Detection Kit (Chemicon).

### Assessment of mitochondrial membrane depolarization

To analyze changes in mitochondrial membrane potential ( $\Delta\psi_m$ ) by FACS, lymphoma cells cultured during 72 hours with 10  $\mu\text{g}/\text{ml}$  of SEE, SEB or PBS were stained with 3,3'-diethyloxycarbocyanine iodine ( $\text{DiOC}_2(3)$ ) (Molecular Probes) at a final concentration of 10 nM according to the manufacturer's protocol. Increases in the percentage of  $\text{DiOC}_2(3)^{\text{low}}$  cells were considered as indicative of mitochondrial depolarization. As a positive control, cells were treated in parallel samples with the protonophore uncoupling agent carbonyl cyanide 3-chlorophenylhydrazone (CCCP) (50  $\mu\text{M}$ ).

### Inhibition of Sag induced apoptosis

Lymphoma cells were cultured with or without 10  $\mu\text{g}/\text{ml}$  of bacterial Sags. At day 2, mouse Fas-Fc protein (10  $\mu\text{g}/\text{ml}$ ) or human IgG (10  $\mu\text{g}/\text{ml}$ ) (both from Sigma) was added. Cells were collected at day 4 and apoptosis was measured using Annexin V-7AAD double staining.

For caspase inhibition assays, Z-IETD-FMK caspase-8 inhibitor or Z-LEHD-FMK caspase-9 inhibitor (Calbiochem) was added one hour prior to addition of Sags. Caspase inhibitors were used at a final concentration of 25  $\mu\text{M}$  in DMSO. DMSO (0.25%) diluted in RPMI-1640 was used as vehicle control. At day 3, cells were collected and apoptosis was measured using Annexin V-7AAD double staining. The percentage of cells with mitochondrial depolarization was determined using  $\text{DiOC}_2(3)$ .

### Survival experiments

To investigate whether bacterial Sags were able to improve the survival of mice carrying cognate lymphoma T cells,  $5 \times 10^3$  T5 or T8 lymphoma cells were inoculated into the tail vein of AKR/J mice. At days 2 and 3 the mice were intraperitoneally treated with 50  $\mu\text{g}$  of SEI or PBS. In another set of experiments, AKR/J mice were intravenously inoculated with  $1 \times 10^3$  T8.2 or T14 lymphoma cells. At days 2 and 3 the mice were intraperitoneally treated with 50  $\mu\text{g}$  of SEB or PBS.

In order to investigate the effect of MMTV-encoded Sags,  $1 \times 10^3$  T14 lymphoma cells were intravenously inoculated in MMTV BALB2-, MMTV BALB14-infected or non-infected AKR/J mice. In another set of experiments T14-carrying mice were MMTV infected 3 days after lymphoma cell inoculation.

All survival studies were conducted in a blind and random fashion. Animals were monitored daily for general appearance and weight change. Mice showing signs of pain and suffering were killed.

### Statistical analysis

Levels of significance were determined using the two-tailed Student's t test.

Statistical analysis of TCRV $\beta$  gene product representation in normal thymocytes compared to thymic lymphoma cells was performed using the exact binomial test.

Comparison of survival curves was performed using the Log-rank test with Prism software. Survival rates were analyzed by chi-square test.

## Results

### Expression of V $\beta$ chains in spontaneous AKR/J thymic lymphomas

Taking into account that it has been proposed that TCR engagement by endogenous Sags would be one epigenetic factor that contributes to the selection of murine pre-neoplastic T cell

clones [31] we first investigated whether lymphomas bearing V $\beta$  chains that recognize endogenous Sags were overrepresented in spontaneous AKR/J lymphomas.

We found that twenty eight of 38 (74%) AKR/J spontaneous lymphomas expressed TCR $\beta$  chains as detected by FACS. Six of 28 lymphomas expressing the TCR $\beta$  chain were not recognized by the panel of MoAbs used. Two thymic lymphomas were found to be V $\beta$ 10+, two V $\beta$ 14+, one V $\beta$ 3+, one V $\beta$ 4+ and one V $\beta$ 2+. Five lymphomas were V $\beta$ 8.3+. Six were recognized by the anti-V $\beta$ 8.1,8.2 MoAb. This group could include lymphomas expressing the V $\beta$ 8.1 chain which recognize an AKR/J endogenous Sag. Three lymphomas expressing other V $\beta$  chains which recognize endogenous Sags were found (V $\beta$ 5, V $\beta$ 11 and V $\beta$ 7 respectively). Figure 1 shows the expected vs observed frequency of lymphomas expressing the indicated V $\beta$  specificities. Expected values were based on the percentage of thymocytes in normal young AKR/J mice that express the indicated V $\beta$  chains [31]. Neither group showed a significant overrepresentation, except the group recognized by anti-V $\beta$ 8.3 MoAb and the group recognized by anti-V $\beta$ 8.1,8.2 MoAb. It is to note that only the group of lymphomas recognized by the V $\beta$ 8.1,8.2 MoAb may include lymphomas specific for an AKR/J endogenous Sag. Thus, our results do not show a clear overrepresentation of lymphomas expressing V $\beta$  chains recognizing endogenous Sags, and do not provide convincing support for a role of endogenous Sags in the selective expansion of pre-neoplastic clones.

### Superantigens increase the proliferation of lymphoma T cells carrying a cognate V $\beta$ chain

The ability of bacterial and viral Sags to increase the *in vitro* proliferation of cognate lymphoma T cells was first investigated. T8 and T8.2 (V $\beta$ 8.1,8.2+) lymphoma cells, but not T14 (V $\beta$ 14+) and T5 (V $\beta$ 5+) neoplastic cells, strongly proliferated *in vitro* in the presence of SEB which interacts with the V $\beta$ 8 family of mouse TCRs. No alterations in the proliferative level of the V $\beta$ 8+ lymphoma cells were detected in the presence of SEI which was recently shown to interact with the V $\beta$ 5 chain in mice [8]. T5 cells increase their proliferative level in the presence of SEI. T14 cells showed a significant increase in their proliferative levels when co-cultured with splenocytes expressing the Sag encoded by MMTV BALB14 [17] whereas no alterations were detected when these

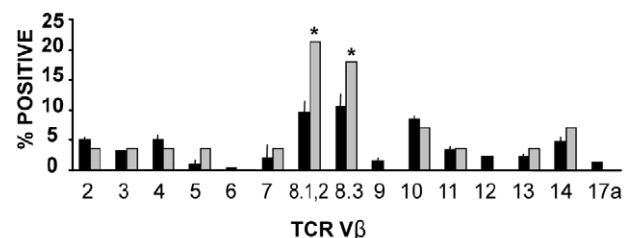

**Figure 1. Phenotypic characterization of spontaneous thymic lymphomas.** The expected versus observed frequency of spontaneous thymic lymphomas expressing specific V $\beta$  determinants. Single cell suspensions from individual AKR/J lymphomas or from the thymus of 3 mo-old AKR/J normal mice were stained with a panel of anti-V $\beta$  specific MoAbs and analyzed by FACS. The black bars represent the expected frequency calculated as the mean  $\pm$  standard deviation of the percentage of thymocytes from 3 mo-old AKR/J normal mice (n=5) that bind a particular anti-V $\beta$  MoAb. The grey bars represent the observed frequency of lymphomas that bind the indicated anti-V $\beta$  MoAb (n=28). Asterisks mark the V $\beta$  determinants that were represented on lymphomas at significantly greater than expected frequencies (\* p<0.05). doi:10.1371/journal.pone.0015694.g001

cells were co-cultured with splenocytes infected with MMTV BALB2 which encodes for a Sag specific for V $\beta$ 2+ T cells [17]. Figure 2A-B depicts representative results.

In order to assess whether Sags were able to increase the *in vivo* proliferation of cognate T cell lymphomas, T5 or T8 neoplastic cells were stained with CFSE and intraperitoneally inoculated in AKR/J mice. One hour later, mice were intraperitoneally inoculated with SEI, SEB, SEE or PBS. Twenty four or 48 hours later, cells were recovered from the intraperitoneal cavity and analyzed by FACS. The decrease in the mean fluorescence intensity was significantly higher when mice were treated with Sags reactive with the V $\beta$  expressed by the neoplastic cells (Figure 2C depicts a representative result). In some experiments, neoplastic cells recovered from mice treated with control Sags displayed a lower decrease in CFSE intensity than that observed in cells from PBS-treated mice (Figure 2C). This fact could be due to cell cycle arrest induced by toxin-dependent increases in endogenous glucocorticoids [32–33] or to other toxic effects [34].

These results show that Sags increase the proliferation of cognate lymphoma T cells both *in vitro* and *in vivo*.

### Superantigens induce apoptosis of cognate lymphoma T cells

The ability of Sags to induce apoptosis in cognate lymphoma T cells after 2–4 days of culture was investigated using propidium iodide or Annexin V staining. On the one hand, SEB but not SEI was able to induce a significant increase in the level of apoptosis in T8 and T8.2 cells. On the other hand, SEI but not SEB was able to increase the levels of apoptosis in T5 cells.

Finally, splenocytes from MMTV BALB14 infected mice but not splenocytes from MMTV BALB2 infected mice were able to induce increases in the level of apoptosis in T14 cells. Figure 3A-C shows representative results.

These results show that Sags induce apoptosis in cognate lymphoma T cells *in vitro*.

In order to determine whether Sags were able to induce apoptosis of lymphoma cells *in vivo*, CFSE-stained T5 or T8 cells were intraperitoneally inoculated in AKR/J mice followed 1 hour later by inoculation of SEI, SEB, SEE or PBS. Forty eight hours later cognate lymphoma T cells showed significant increases in the apoptosis levels as observed by FACS analysis (Figure 4A-B).

Additionally, T5 or T8 cells were inoculated in the footpad and 3–6 days later mice received SEI, SEB or PBS. Popliteal lymph nodes were excised 24 hours later and apoptosis was assessed by FACS and TUNEL assays. As can be observed in Figure 4C-E, a significant increase in the apoptosis of cognate lymphoma T cells was recorded.

These results show that Sags induce apoptosis in cognate lymphoma T cells not only *in vitro* but also *in vivo*.

### Apoptosis of lymphoma T cells induced by bacterial Sags involves Fas-Fas-L interaction

There are two main pathways to apoptotic cell death. One involves the interaction of a death receptor such as the tumor necrosis factor receptor-1 (TNFR1) or the Fas receptor with its ligand and the second pathway depends on the participation of mitochondria. Proapoptotic and antiapoptotic members of the Bcl-2 family regulate the mitochondrial pathway. For a review, see Arnold R. et al [35].

Whereas Bcl-2 expression was not found to be significantly increased in lymphoma cells (data not shown) Fas expression was found to be markedly decreased in the 28 lymphomas tested (Figure 5A).

A

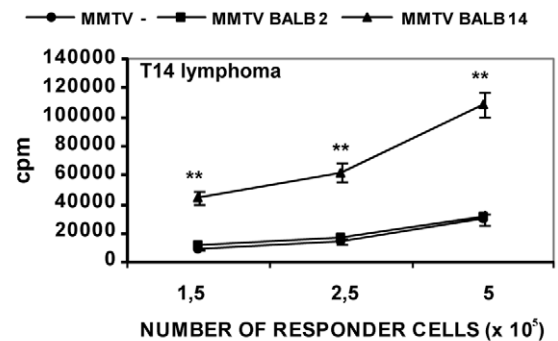

B

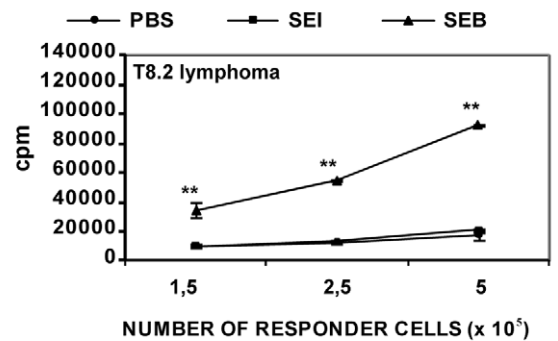

C

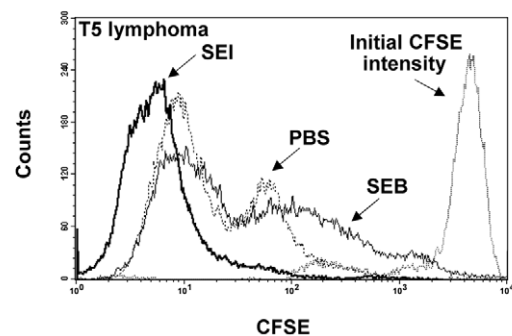

**Figure 2. Sags induce increases in the proliferative levels of cognate lymphoma T cells.** (A–B) Proliferative response of lymphoma T cells *in vitro*. (A) Different numbers of T14 lymphoma cells were co-cultured with  $0.7 \times 10^5$  mitomycin C-pretreated splenocytes from (●) non-infected AKR/J mice, (■) MMTV BALB2-infected AKR/J mice or (▲) MMTV BALB14-infected AKR/J mice. The proliferative response was assessed by  $^3\text{H}$ -thymidine incorporation during the last 18 hr of a 1-day culture period. Data are expressed as the mean  $\pm$  SD,  $n=5$ ,  $^{**}p<0.01$ . (B) Different numbers of T8.2 lymphoma cells were co-cultured with  $0.7 \times 10^5$  mitomycin C-pretreated intraperitoneal macrophages in the presence of  $10 \mu\text{g/ml}$  of (■) SEI, (▲) SEB or (●) PBS. The proliferative response was assessed by  $^3\text{H}$ -thymidine incorporation during the last 18 hr of a 1-day culture period. Data are expressed as the mean  $\pm$  SD,  $n=5$ ,  $^{**}p<0.01$ . (C) Proliferative response of lymphoma T cells *in vivo*. CFSE-stained T5 lymphoma cells ( $5 \times 10^6$ ) were transferred intraperitoneally into syngeneic AKR/J mice. The mice were divided into three groups ( $n=3$  per group) and received an intraperitoneal injection of  $25 \mu\text{g}$  of SEB, SEI or PBS. Twenty four hours later cells were collected by intraperitoneal washing and CFSE fluorescence was analyzed. Overlaid histograms depict a representative example. All the experiments were performed three times with similar results. doi:10.1371/journal.pone.0015694.g002

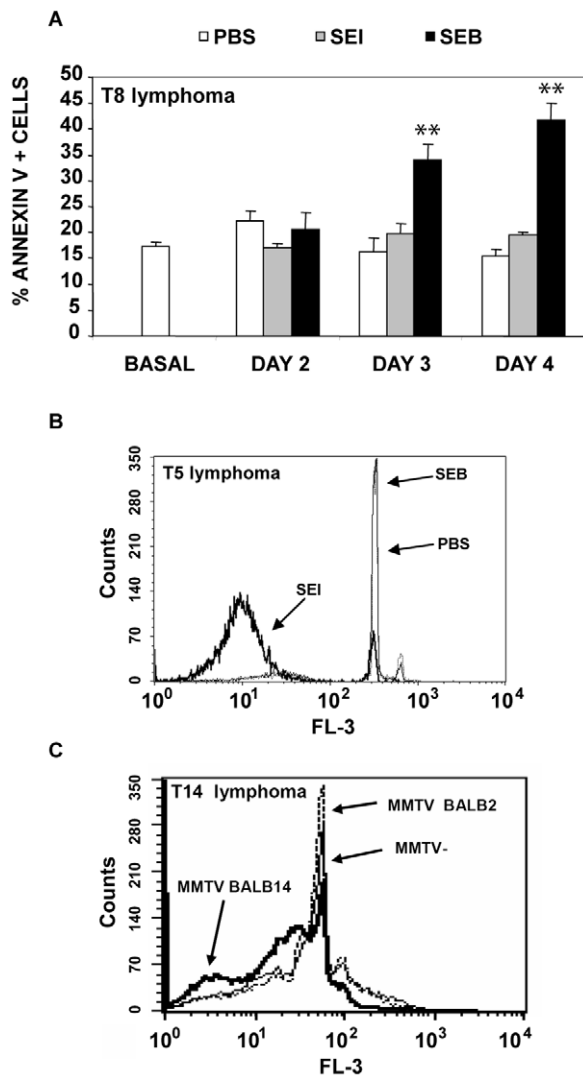

**Figure 3. Sags increase apoptosis of cognate lymphoma T cells *in vitro*.** (A and B) T8 or T5 lymphoma cells ( $2.5 \times 10^7$ ) were co-cultured with  $0.7 \times 10^5$  intraperitoneal macrophages in the presence of  $10 \mu\text{g/ml}$  of the indicated bacterial Sags or PBS. (A) Percentage of apoptosis in T8 cells at different days as assessed by FACS using Annexin V-7AAD. Data are expressed as the mean  $\pm$  SD,  $n=4$ , \*\*  $p<0.01$ . (B) Representative overlaid histograms of PI showing the DNA content in T5 cells cultured with  $10 \mu\text{g/ml}$  of SEB, SEI or PBS during 3 days. (C) T14 lymphoma cells ( $2.5 \times 10^5$ ) were co-cultured with  $0.7 \times 10^5$  mytomycin-C pretreated splenocytes from (MMTV-) non-infected AKR/J mice, MMTV BALB2- or MMTV BALB14-infected AKR/J mice. The Figure depicts representative overlaid histograms of PI showing the DNA content in T14 cells at day 3 of culture. All the experiments were performed five times with similar results.  
doi:10.1371/journal.pone.0015694.g003

The mechanisms underlying apoptosis induced by bacterial Sags in two of the lymphomas (T8 and T5) were studied. Exposure to specific bacterial Sags did not induced alterations in Bcl-2 expression or in the level of expression of TNFR1 and tumor necrosis factor-related apoptosis-inducing ligand (TRAIL) (data not shown). Contrarily, a marked increase in the expression of Fas and in the percentage of Fas-L positive neoplastic cells was recorded when cells were cultured with specific Sags (Figure 5B-E). Occasionally *in vitro* exposure of lymphoma cells to non specific bacterial Sags induced a slight but not significant increase in the expression of Fas (Figure 5E).

In order to study whether Sags were able to induce increases in Fas and Fas-L expression *in vivo*, CFSE-stained T5 and T8 lymphoma cells were intraperitoneally inoculated and 1 hour later mice received SEE, SEI, SEB or PBS. One to three days later, cognate lymphoma cells exhibited significantly higher expression levels of Fas; the percentage of Fas-L positive cells was also significantly increased. Figure 5F-G shows representative results. These results show that bacterial Sags upregulate the expression of Fas and Fas-L on lymphoma T cells expressing the appropriate TCR V $\beta$  chain both *in vitro* and *in vivo*.

An important inhibition of specific apoptosis could be observed when T8 cells were treated with SEB in the presence of caspase-8 inhibitor (Figure 6A). Similar results were obtained when T5 cells were cultured with SEI in the presence of caspase-8 inhibitor (data not shown). Finally, mouse Fas-Fc protein was used as a competitive inhibitor of Fas/Fas-L interactions [36]. We found that Fas-Fc effectively inhibited apoptosis (Figure 6B) confirming the involvement of the Fas-Fas-L pathway in apoptosis induced by bacterial Sags.

An involvement of mitochondria has also been demonstrated in Fas signaling, suggesting a functional role of this organelle in death receptor-mediated apoptosis of certain cell types. For a review, see Barnhart B.C. et al [37]. Changes in the membrane potential  $\Delta\psi_m$  of T8 after Sag treatment was assessed using DioC<sub>2</sub>(3). SEB but not SEE was able to induce a significant increase in the percentage of DioC<sub>2</sub>(3)<sup>low</sup> T8 cells (Figure 6C-D). Besides, when cells were treated with the caspase-9 inhibitor, a significant inhibition of specific cell death was recorded (Figure 6A). These results suggest that mitochondria are also involved in Sag-induced apoptosis. Finally, the caspase-8 inhibitor was able to significantly decrease the dissipation of mitochondrial  $\Delta\psi$  (Figure 6E), raising the possibility that in our experimental conditions, Sag-induced apoptosis involves a cross-talk between the extrinsic and the mitochondrial pathways.

### Sags significantly prolong the survival of lymphoma carrying mice

Intravenous injection of AKR/J lymphoma cells in 2 mo-old syngeneic mice caused disseminated and fatal lymphoma/leukemia. In order to evaluate whether Sags were able to increase the survival of lymphoma carrying mice T8.2, T8, T5 and T14 lymphomas were used. In a first set of experiments, AKR/J mice were intravenously inoculated with T5 or T8 cells and treated with SEI or PBS at days 2 and 3 after tumor inoculation. Figure 7A-B shows that SEI treatment was able to significantly increase the survival time of T5 lymphoma bearing mice (log-rank test,  $p=0.0005$ ). SEI did not affect the survival of mice bearing T8 cells.

In a subsequent set of experiments, AKR/J mice were intravenously inoculated with T14 or T8.2 cells. Two and 3 days later the mice were intraperitoneally treated with SEB or PBS. Figure 7C-D shows that treatment with SEB was able to significantly increase the survival of mice challenged with T8.2 lymphoma (log-rank test,  $p<0.0001$ ). No significant improvement was observed in SEB-treated T14 carrying mice (log-rank test,  $p=0.8$ ). At day 22, 100% (22/22) of non-treated mice had died. After a follow-up period of 100 days, 40.9% (9/22) of SEB-treated mice survived without signs of disease (Chi-square test,  $p=0.0008$ ). Consistent with elimination of the neoplastic cells in Sag-treated mice, histopathologic and cytofluorometric examination of liver, bone marrow, lymph nodes and spleen did not reveal signs of disease (data not shown).

The effect of an MMTV-encoded Sag on the survival of cognate lymphoma T cells was also investigated. Normal or MMTV-infected AKR/J mice were intravenously inoculated with T14

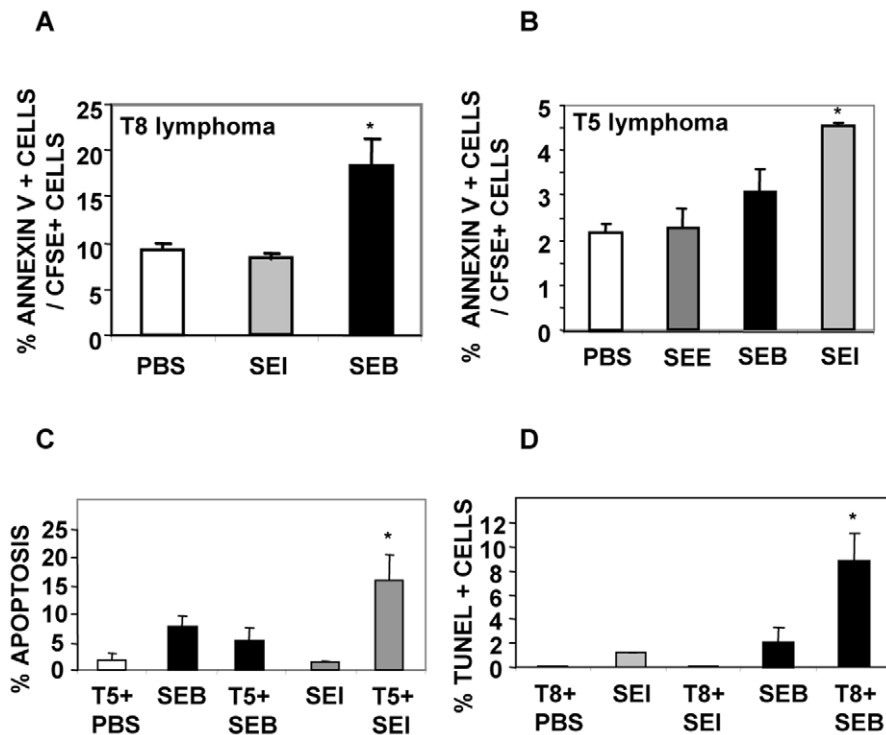

**Figure 4. Sags increase apoptosis of cognate lymphoma T cells *in vivo*.** (A–B) AKR/J mice were intraperitoneally inoculated with  $5 \times 10^6$  CFSE-labeled T8 or T5 cells. One hour later 25  $\mu\text{g}$  of SEE, SEI, SEB or PBS were intraperitoneally administered. After 48 hours, cells were recovered and the percentage of Annexin V+ cells/CFSE+ cells was assessed by FACS. Data are expressed as the mean  $\pm$  SD,  $n = 4$  per group. \* $p < 0.05$ . (C) AKR/J mice were inoculated in the footpad with  $0.3 \times 10^6$  T5 cells and 6 days later mice were footpad injected with 10  $\mu\text{g}$  of the indicated Sag or PBS. Twenty four hours later PLN were removed and the percentage of apoptotic cells was determined by evaluating the percentage of hypodiploid nuclei by PI staining. Data are expressed as the mean  $\pm$  SD,  $n = 4$  per group. \* $p < 0.05$ . (D) AKR/J mice were inoculated in the footpad with  $0.3 \times 10^6$  T8 cells and 3 days later they were treated with 10  $\mu\text{g}$  of the indicated Sag or PBS. Normal AKR/J mice were also inoculated with Sags or PBS. Twenty four hours later PLN were removed and paraffin-embedded. PLN were processed for apoptosis detection using a peroxidase-conjugated *in situ* TUNEL assay. Quantitative studies were performed in a blinded fashion using light microscopy on five or more fields in each sample. Original magnification  $\times 400$ . Data are expressed as the mean percentage of TUNEL-positive cells  $\pm$  SD,  $n = 4$  per field. \* $p < 0.05$ . All the experiments were performed three times and gave similar results.

doi:10.1371/journal.pone.0015694.g004

cells. The 65% (13/20) of non-infected control mice died. A similar outcome was observed in MMTV BALB2-infected hosts (70%, 14/20). A significantly improved survival of MMTV BALB14 infected mice was observed, as reflected by survival of >90% (21/22) of the animals at day 200 (Chi-square test,  $p < 0.0001$ ), (Figure 7E). The surviving mice were killed and their lymphoid organs were studied using histopathological and cytofluometric techniques. The percentage of V $\beta$ 14+ cells in peripheral blood, lymph nodes, and spleen was found to be <0.01% in all the survivors. Two of the mice presented new thymic lymphomas, both expressing the V $\beta$ 8 family chain.

Finally, AKR/J mice intravenously inoculated with T14 lymphoma cells were infected 3 days later with either MMTV BALB2 or BALB14. As can be shown in Figure 7F, infection with MMTV BALB14 induced a significant increase in the percentage of the surviving mice: 72.7% (16/22) vs 31.8% (7/22), (Chi-square test,  $p = 0.0066$ ). MMTV BALB2 infection did not alter the survival of T14 bearing mice (27.3%, 6/22) (Chi-square test,  $p = 0.7$ ). All surviving mice showed less than 0.01% of V $\beta$ 14+ cells at day 200 (data not shown).

These results show that Sags are able to significantly prolong the survival of mice carrying lymphoma T cells bearing cognate V $\beta$  chains. Moreover, the permanent expression of a retroviral-encoded Sag was able to induce the complete remission of the neoplasia in a high percentage of mice.

## Discussion

It has been extensively reported that the interaction of Sags with normal T lymphocytes expressing particular TCR V $\beta$  chains leads initially to the stimulation and subsequently to the clonal deletion by apoptosis of reactive T cells [1–4]. However, there is scarce information concerning the effects of Sags on cognate neoplastic T cells.

Herein we show that bacterial and MMTV-encoded Sags are able to induce both *in vitro* and *in vivo* the apoptosis of AKR/J lymphoma T cells bearing cognate V $\beta$  chains. Importantly, Sags significantly improve the survival of mice carrying cognate T cell lymphomas.

A role for Sags in the progression of murine T cell lymphomas has been hypothesized. It has been proposed that TCR engagement by endogenous Sags would be one epigenetic factor that contributes to the evolution and selection of murine neoplastic T cell clones [31]. To test this hypothesis we investigated whether lymphomas bearing V $\beta$  chains that recognize endogenous Sags were overrepresented in spontaneous AKR/J lymphomas. We found that both the frequency of V $\beta$ 8.1,8.2+ lymphomas (which could include lymphomas expressing the forbidden V $\beta$ 8.1 chain) and that of V $\beta$ 8.3+ lymphomas (carrying a V $\beta$  segment that does not recognize any endogenous Sag in AKR/J mice) were significantly increased. Tumors expressing other V $\beta$  chains were

A

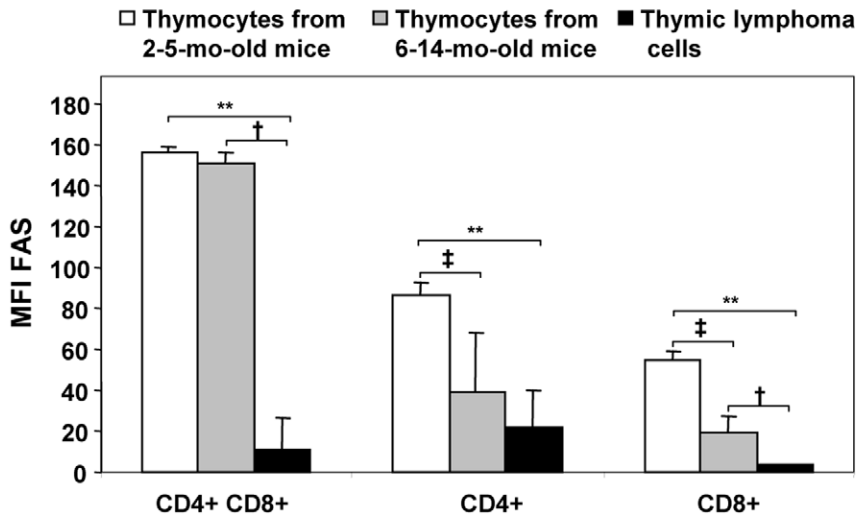

B

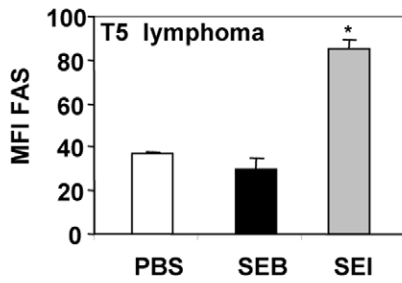

C

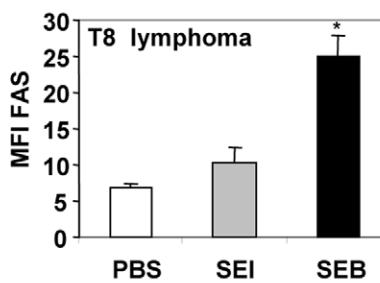

D

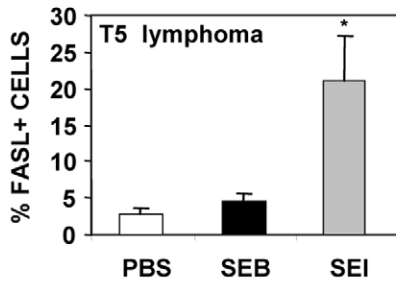

E

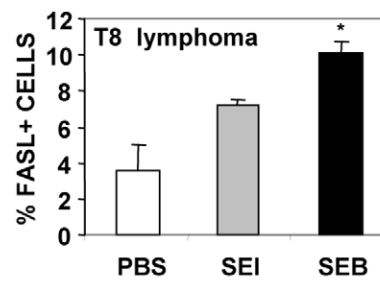

F

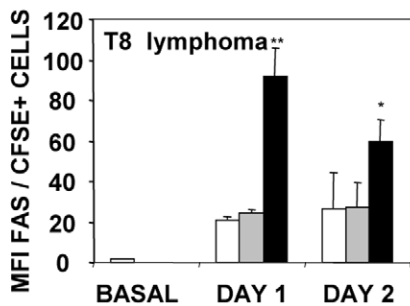

G

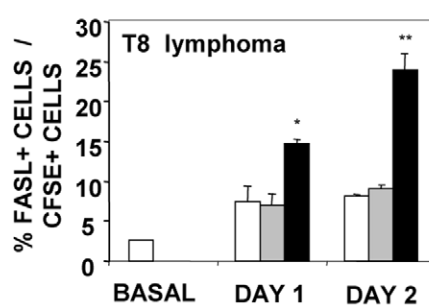

**Figure 5. Sags induce increases in the level of expression of Fas and in the percentage of Fas-L+ cells in lymphoma T cells.** Lymphoma T cells display low levels of Fas expression. (A) Single cell suspensions from thymus from 2-5-mo-old animals (n=8), 6-14-mo-old animals (n=11) and spontaneous AKR/J thymic lymphomas (n=28) were stained with anti-CD4, anti-CD8 and anti-Fas MoAbs. Data show the mean fluorescence intensity (MFI) of Fas in each group. Data are expressed as the mean  $\pm$  SD. \*\*p<0.01, † p<0.05, ‡ p<0.05. (B, C, D, E)  $2.5 \times 10^5$  T5 or T8 lymphoma cells were co-cultured with  $0.7 \times 10^5$  intraperitoneal macrophages and treated with 10  $\mu$ g/ml of SEI, SEB or PBS. At day 3, cells were harvested and stained with anti-Fas or anti-FasL MoAbs. (B, C) MFI of Fas, (D, E) percentage of FasL+ cells. Data are expressed as the mean  $\pm$  SD. \*p<0.05. (F, G) AKR/J mice were intraperitoneally inoculated with  $5 \times 10^6$  T8 CFSE- labeled cells and intraperitoneally injected with 25  $\mu$ g of SEE (grey bar), SEB (black bar) or PBS (white bar). At days 1 and 2 cells were recovered, stained with anti-Fas or anti-FasL MoAbs and analyzed by FACS. Data are expressed as the mean  $\pm$  SD, n=4 per group. \*\*p<0.01, \*p<0.05. All the experiments were performed three times with similar results. doi:10.1371/journal.pone.0015694.g005

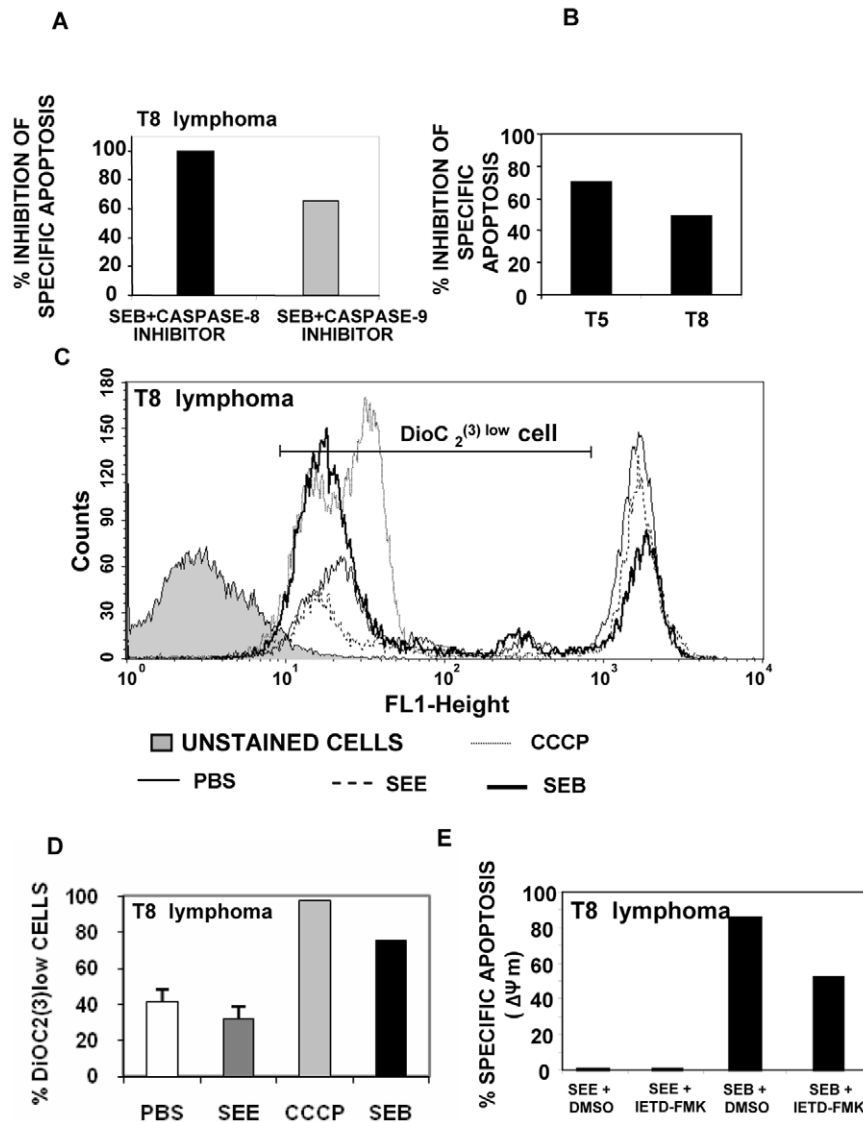

**Figure 6. Mechanisms involved in Sag-induced apoptosis.** (A) Inhibition of Sag-induced apoptosis of lymphoma cells by caspase-8 and caspase-9 inhibitors. T8 cells ( $2.5 \times 10^5$ ) co-cultured with peritoneal macrophages ( $0.7 \times 10^5$ ) were treated during two hours with 25  $\mu$ M of Z-IETD-FMK (caspase-8 inhibitor), Z-LEHD-FMK (caspase-9 inhibitor) or DMSO prior to the addition of 10  $\mu$ g/ml of SEB or PBS. At day 3, cells were recovered, stained with Annexin/7-AAD and analyzed by FACS. The percentage of specific apoptosis was calculated as follows:  $100 \times (\% \text{ Sag induced apoptosis} - \% \text{ spontaneous apoptosis with PBS}) / (100 - \% \text{ spontaneous apoptosis with PBS})$ . Inhibition of apoptosis by caspase inhibitors was calculated as reduction of specific apoptosis compared to specific apoptosis in the presence of DMSO set as 100%. (B) Inhibition of apoptosis by Fas-Fc fusion protein. T5 or T8 cells ( $2.5 \times 10^5$ ) co-cultured with peritoneal macrophages ( $0.7 \times 10^5$ ) were treated with SEI, SEB (10  $\mu$ g/ml) or PBS. Ten  $\mu$ g/ml of Fas-Fc, HulGg or PBS were added at day 2. At day 4, cells were harvested and stained with Annexin V-7AAD. Specific apoptosis was calculated as described in (A). Inhibition was calculated as reduction of apoptosis compared to apoptosis in the presence of HulGg set as 100%. (C–D) Sags cause mitochondrial depolarization in cognate lymphoma T cells. T8 lymphoma cells ( $2.5 \times 10^5$ ) were cultured in the presence of 10  $\mu$ g/ml of SEE, SEB or PBS as described in Material and Methods. Cells were harvested 72 hours after Sag exposure and the mitochondrial membrane potential ( $\Delta\psi_m$ ) was measured by FACS using DiOC<sub>2</sub>(3) staining. Representative overlaid histograms for DiOC<sub>2</sub>(3) fluorescence are depicted in (C). (D) Show the percentage of DiOC<sub>2</sub>(3)<sup>low</sup> cells. Data are expressed as the mean  $\pm$  SD. \*p<0.05. (E) Caspase-8 inhibitor decreases the loss of  $\Delta\psi_m$  induced by SEB. T8 lymphoma cells ( $0.25 \times 10^6$ ) were incubated with 25  $\mu$ M Z-IETD-FMK or DMSO for 2 hours before exposure to 10  $\mu$ g/ml of SEE, SEB or PBS. Cells were harvested 72 hours later and  $\Delta\psi_m$  was measured by FACS using DiOC<sub>2</sub>(3) staining. Apoptotic cells were identified by their decrease in  $\Delta\psi_m$  (DiOC<sub>2</sub>(3)<sup>low</sup>). Data show the percentage of specific apoptosis calculated as described in (A). All the experiments were performed at least three times with similar results. doi:10.1371/journal.pone.0015694.g006



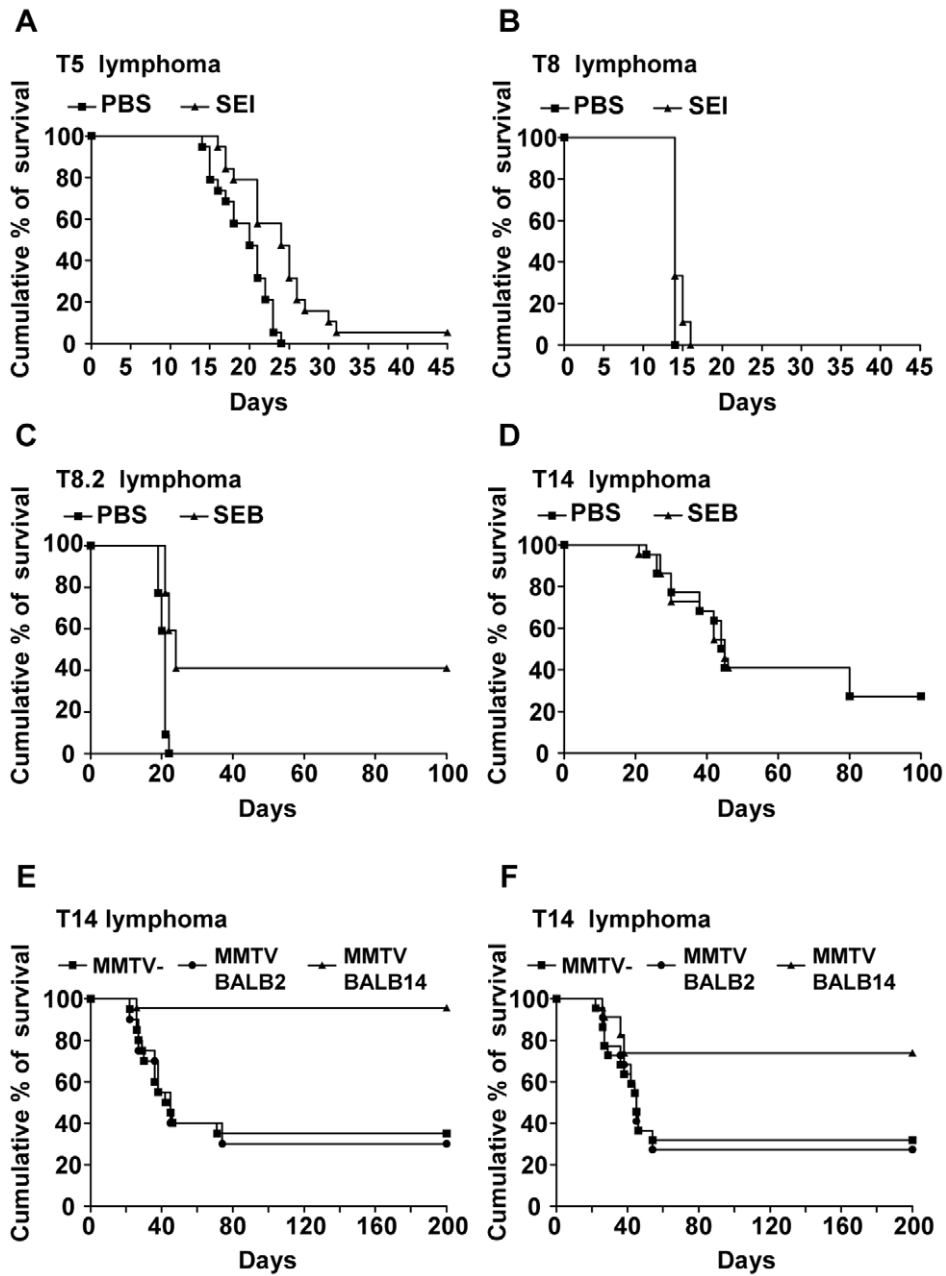

**Figure 7. Sags increase the survival of cognate lymphoma-bearing mice.** (A) T5 cells ( $5 \times 10^3$ ) or (B) T8 cells ( $5 \times 10^3$ ) were injected into the tail vein of AKR/J mice ( $n = 19$  per group). At days 2 and 3, mice received an intraperitoneal injection of 50  $\mu\text{g}$  of SEI or PBS.  $p = 0.0005$ , log-rank test. (C) T8.2 cells ( $1 \times 10^3$ ) or (D) T14 cells ( $1 \times 10^3$ ) were intravenously inoculated in AKR/J mice ( $n = 22$  per group). At days 2 and 3 mice were intraperitoneally inoculated with 50  $\mu\text{g}$  of SEB or PBS. Control mice were treated with PBS.  $p < 0.0001$ , log-rank test. (E) T14 cells ( $1 \times 10^3$ ) were injected into the tail vein of MMTV BALB14-infected ( $n = 22$ ) and MMTV BALB2-infected ( $n = 20$ ) and non-infected ( $n = 20$ ) AKR/J mice.  $p < 0.0001$ , log-rank test. (F) T14 cells ( $1 \times 10^3$ ) were intravenously injected in AKR/J mice. Two days later, mice were infected as described in Materials and Methods with MMTV BALB14 ( $n = 22$ ) or MMTV BALB2 ( $n = 22$ ). Control mice received PBS ( $n = 22$ ).  $p = 0.0123$ , MMTV- vs MMTV BALB14;  $p = 0.0075$ , MMTV BALB2 vs MMTV BALB14, log-rank test.

doi:10.1371/journal.pone.0015694.g007

not found to be significantly overrepresented. Thus, our results failed to provide convincing evidence for a role of endogenous Sags in the selective expansion of pre-neoplastic clones.

One important issue addressed in this study is whether AKR/J neoplastic T cells are able to undergo apoptosis upon exposure to Sags. Although Sags increased the proliferative levels of lymphoma T cells expressing a cognate V $\beta$  chain both *in vitro* and *in vivo*, proliferation was followed/accompanied by death by apoptosis of cognate neoplastic T cells. Sags did not induce increases in the

apoptosis levels of non cognate lymphoma cells. These results show that Sags are able to signal through the V $\beta$  chain and to induce apoptosis in murine lymphoma T cells both *in vitro* and *in vivo*. Interestingly, our results show that a lymphoma that escaped thymic negative selection driven by an endogenous viral Sag (Mtv-9), and thus expresses a forbidden V $\beta$  chain (V $\beta$ 5), is still susceptible to the induction of apoptosis triggered by a bacterial Sag reactive with its TCR. In this sense, it has been proposed that different Sags may form distinct ternary MHC-Sag-TCR T cell

signaling complexes which could lead to distinct physiological outcomes [38].

Different mechanisms of apoptosis induced by bacterial Sags in normal T cells have been reported. Several groups have reported Fas-Fas-L independent apoptosis pathways after stimulation with bacterial Sags. These pathways include members of the Bcl-2-family [39–40] and/or reactive oxygen species [41]. Other studies, however, have shown that Fas/Fas-L interaction is involved in bacterial Sag mediated apoptosis [36,42–43]. Finally, it has been proposed that the pathway involved would depend on the doses of bacterial Sags or on the experimental model used. After determining that the expression of Bcl-2 in the AKR/J spontaneous lymphomas was not altered while Fas expression was markedly decreased in all thymomas tested, the mechanisms underlying apoptosis induced by bacterial Sags in two lymphomas were studied. Whereas Sag exposure did not induce alterations in the expression of Bcl-2, TRAIL or TNFR1, interaction of Sags with the cognate V $\beta$  chain of lymphoma T cells revert the low expression of Fas characteristic of these cells both *in vitro* and *in vivo*. Inhibition of caspase-8 markedly decreased apoptosis induced by Sags. Mouse Fas-Fc- a competitive inhibitor of Fas-Fas-L interactions effectively inhibited apoptosis in the lymphomas studied confirming the involvement of the Fas-Fas-L pathway in apoptosis induced by bacterial Sags. It has been reported that in certain cell types mitochondria is involved in Fas signaling. For a review, see Barnhart B.C. et al [37]. Herein we show that Sags induced loss of transmembrane potential in this organelle. Besides, a significant inhibition of apoptosis was recorded in the presence of a caspase-9 inhibitor. Finally, inhibition of caspase-8 significantly decreased the dissipation of  $\Delta\psi_m$ , raising the possibility that Sag-induced apoptosis involves a cross talk between the extrinsic and the mitochondrial pathways.

Finally, the *in vivo* effect of retroviral and bacterial Sags on the survival of lymphoma carrying mice was investigated. SEI was able to significantly increase the survival time of mice carrying T5 neoplastic cells. Treatment with SEB was able to induce long-term survival of hosts injected with T8.2 neoplastic cells. Whereas all control mice died in three weeks, 40% of SEB treated mice were still free of disease at day 100. The fact that toxins did not affect the survival of mice bearing non-cognate lymphoma T cells strongly suggests that the effect of these toxins is mainly due to their superantigenic activity.

The effect of a retroviral-encoded Sag in the survival of lymphoma bearing mice was assessed. Mice intravenously inoculated with T14 cells showed a remarkable enhancement of survival when the hosts were infected with MMTV BALB14 before or after tumor inoculation. No improvement in survival was observed in MMTV BALB2 infected hosts or in mice treated with SEB. These results clearly show that Sags are able to significantly improve the survival of mice bearing cognate-T cell lymphomas.

The fate of the interaction between Sags and human lymphoma/leukemia T cells is a matter of debate. It has been

reported that leukemic cells from patients with leukemia of T cell origin have the ability to respond to TCR-dependent bacterial Sags, as assessed by their proliferative response *in vitro* [44–45]. Based on these data, it has been proposed that bacterial infection in such patients might contribute to the expansion of leukemic cells. Noteworthy, apoptosis of leukemic cells was not assessed. It has also been hypothesized that bacterial Sags could be involved in malignant transformation and/or in the expansion and evolution of cutaneous T cell lymphomas (CTCL), this hypothesis was based in the restricted use of particular V $\beta$  by CTCL cells [46–48]. Contrarily, Vonderheid EC et al [49] hypothesized that chronic stimulation of skin-homing normal T cells by staphylococcal Sags would act to deplete V $\beta$ -responsive normal T cells prior to neoplastic transformation and as a consequence the V $\beta$  usage by the neoplastic T cells may be skewed and they would be more likely to express V $\beta$  segments that are relatively unaffected by staphylococcal Sags. It would be of great interest to determine whether different human T cell malignancies expressing TCRs are susceptible to the induction of apoptosis by Sags. Our unpublished results show that cells from the human Jurkat T cell line derived from an acute T cell leukemia are highly susceptible to Sag-induced apoptosis (I.N. and I.P., manuscript in preparation).

Results reported herein clearly show that cells from AKR/J T cell lymphomas are susceptible to be deleted as a consequence of Sag signaling via TCR. Importantly, Sags were able to increase the survival of mice bearing very aggressive lymphomas. If Sags were able to induce apoptosis in human neoplastic T cells expressing functional TCRs, they could be envisaged as therapeutic agents. The use of Sags as therapeutic agents in T cell malignancies would have the advantage of deleting restricted T cell clones without causing the death of other normal cells. If toxic Sags are to be used in humans, their toxic effects might be separated from their superantigenic activity. In this sense, it has been shown that carboxymethylation of SEB blocks its enterotoxic but not its mitogenic properties [50]. Furthermore, many retroviral-encoded Sags are not associated with toxic effects and human T cells are able to recognize them, opening the possibility of their use in gene therapy. Finally, treatments based on the inoculation of dendritic cells transfected with mRNA coding for MMTV Sags would avoid both toxicity and the risks associated with genetic therapies.

## Acknowledgments

We thank C. D. Pasqualini for helpful discussions.

## Author Contributions

Conceived and designed the experiments: IP IN. Performed the experiments: JM PMB GC DL. Analyzed the data: JM PMB GC DL IN IP. Wrote the paper: JM PMB GC IP IN.

## References

- Marrack P, Blackman M, Kushnir E, Kappler J (1990) The toxicity of staphylococcal enterotoxin B in mice is mediated by T cells. *J Exp Med* 171: 455–464.
- Mac Donald HR, Baschieri S, Lees RK (1991) Clonal expansion precedes anergy and death of V $\beta$ 8+ peripheral T cells responding to staphylococcal enterotoxin B *in vivo*. *Eur J Immunol* 21(8): 1963–1966.
- Choi Y, Kappler JE, Marrack P (1991) A Superantigen encoded in the open reading frame of the 3' long terminal repeat of the mouse mammary tumor virus. *Nature* 350:6315: 203–207.
- Renno T, Attinger A, Locatelli S, Bakker T, Vacheron S, et al. (1999) Cutting edge: Apoptosis of superantigen-activated T cells occurs preferentially after a discrete number of cell divisions *in vivo*. *J Immunol* 162: 6312–6315.
- Fraser JD, Proft T (2008) The bacterial superantigen and superantigen-like proteins. *Immunol Rev* 225: 226–43.
- Janeway CA, Jr., Yagi J, Conrad PJ, Katz ME, Jones B, et al. (1989) T-cell responses to MIs and to bacterial proteins that mimic its behavior. *Immunol Rev* 107: 61–88.
- Callahan JE, Herman A, Kappler JW, Marrack P (1990) Stimulation of B10.BR T cells with superantigenic staphylococcal toxins. *J Immunol* 144(7): 2473–9.
- Fernández MM, De Marzi MC, Berguer P, Burzyn D, Langley RJ, et al. (2006) Binding of natural variants of staphylococcal superantigens SEG and SEI to TCR and MHC class II molecule. *Mol Immunol* 43(7): 927–38.
- Bittner JJ (1936) Some possible effects of nursing on the mammary gland tumor incidence in mice. *Science* 84(2172): 162.

10. Callahan R, Smith GH (2000) MMTV-induced mammary tumorigenesis: gene discovery, progression to malignancy and cellular pathways. *Oncogene* 19(8): 992–1001.
11. Simpson E (1993) T cell repertoire selection by mouse mammary tumour viruses. *Eur J Immunogenet* 20(2): 137–49.
12. Frankel WN, Rudy C, Coffin JM, Huber BT (1991) Linkage of Mls genes to endogenous mammary tumor viruses of inbred mice. *Nature* 349(6309): 526–28.
13. Acha-Orbea H, MacDonald HR (1995) Superantigens of mouse mammary tumor virus. *Annu Rev Immunol* 13: 459–86.
14. Brandt-Carlson C, Butel JS, Wheeler D (1993) Phylogenetic and structural analyses of MMTV LTR ORF sequences of exogenous and endogenous origins. *Virology* 193(1): 171–85.
15. Yazdanbakhsh K, Park CG, Winslow GM, Choi Y (1993) Direct evidence for the role of COOH terminus of mouse mammary tumor virus superantigen in determining T cell receptor V $\beta$  specificity. *J Exp Med* 178(2): 737–41.
16. Golovkina TV, Piazzon I, Nepomnaschy I, Buggiano V, Olano Vela M, et al. (1997) Generation of a tumorigenic milk-borne mouse mammary tumor virus by recombination between endogenous and exogenous viruses. *J Virol* 71(5): 3895–3903.
17. Buggiano V, Goldman A, Nepomnaschy I, Bekinshtein P, Berguer P, et al. (1999) Characterization of two infectious mouse mammary tumor viruses: superantigenicity and tumorigenicity. *Scand J Immunol* 49: 269–77.
18. Newell KA, Ellernhorn JDI, Bru DS, Bluestone JA (1991) *In vivo* T cell activation by staphylococcal enterotoxin B prevents outgrowth of a malignant tumor. *Proc Natl Acad Sci USA* 88: 1074–78.
19. Kominsky SL, Torres BA, Honeika AC, Lake FA, Johnson H (2001) Superantigen enhanced protection against a weak tumor-specific melanoma antigen implications for prophylactic vaccination against cancer. *Int J Cancer* 94(6): 834–841.
20. Perabo FG, Willert PL, Wirger A, Schmidt DH, Wardelmann E, et al. (2005) Preclinical evaluation of superantigen (staphylococcal enterotoxin B) in the intravesical immunotherapy of superficial bladder cancer. *Int J Cancer* 115(4): 591–8.
21. Gidlöf C, Dohlsten M, Lando P, Kalland T, Sundström C, et al. (1997) A superantigen-antibody fusion protein for T-cell immunotherapy of human B-lineage malignancies. *Blood* 89(6): 2089–97.
22. Litton MJ, Dohlsten M, Rosendahl A, Ohlsson L, Sogaard M, et al. (1999) The distinct role of CD4+ and CD8+ T-cells during the anti-tumour effects of targeted Superantigens. *British J Cancer* 81(2): 359–366.
23. Tordsson JM, Ohlsson LG, Abrahamson LB, Kalstrom PJ, Lando PA, et al. (2000) Phage-selected primate antibodies fused to superantigens for immunotherapy of malignant melanoma. *Cancer Immunol Immunother* 48: 691–702.
24. Forsberg G, Ohlsson L, Brodin T, Björk P, Lando PA, et al. (2001) Therapy of human non-small-cell lung carcinoma using antibody targeting of a modified superantigen. *British J Cancer* 85(1): 129–136.
25. Ragnarsson L, Stromberg T, Wijdenes J, Totterman TH, Weigelt C (2001) Multiple myeloma cells are killed by syndecan-1-directed superantigen-activated T cells. *Cancer Immunol Immunother* 50: 382–390.
26. Ueno A, Arakawa F, Abe H, Matsumoto H, Kudo T, et al. (2002) T-cell immunotherapy for human MK-1-expressing tumors using a fusion protein of the superantigen SEA and anti-MK-1 scFv antibody. *Anticancer Res* 22(2A): 769–76.
27. Terman DS, Bohach G, Vandenesch F, Etienne J, Lina G, et al. (2006) Staphylococcal superantigens of the enterotoxin gene cluster (*egc*) for treatment of stage IIIb non-small cell lung cancer with pleural effusion. *Clin Chest Med* 27(2): 321–34.
28. Sundstedt A, Celander M, Ohman MW, Forsberg G, Hedlund G (2009) Immunotherapy with tumor-targeted superantigens (TTS) in combination with docetaxel results in synergistic anti-tumor effects. *Int Immunopharmacol* 9(9): 1063–70.
29. Lombardi G, Burzyn D, Mundiñano J, Berguer P, Bekinshtein P, et al. (2005) Cathepsin-L influences the expression of extracellular matrix in lymphoid organs and plays a role in the regulation of thymic output and of peripheral T cell number. *J Immunol* 174(11): 7022–32.
30. Cabrera G, Burzyn D, Mundiñano J, Courreges MC, Camicia G, et al. (2008) Early increases in superantigen-specific Foxp3+ regulatory T cells during mouse mammary tumor virus infection. *J Virol* 82(15): 7422–31.
31. Gomez G, Clarkin KZ, Kraig E, Infante AJ, Richie ER (2000) TCR V $\beta$  repertoire restriction and lack of CDR3 conservation implicate TCR-superantigen interactions in promoting the clonal evolution of murine thymic lymphomas. *Int Immunol* 12(3): 263–70.
32. Shurin G, Shanks N, Nelson L, Hoffman G, Huang L, et al. (1997) Hypothalamic-pituitary-adrenal activation by the bacterial superantigen staphylococcal enterotoxin B: role of macrophages and T cells. *Neuroendocrinology* 65(1): 18–28.
33. Gonzalo JA, González-García A, Martínez C, Kroemer G (1993) Glucocorticoid-mediated control of the activation and clonal deletion of peripheral T cells *in vivo*. *J Exp Med* 177(5): 1239–46.
34. Fleming SD, Iandolo JJ, Chapes SK (1991) Murine macrophage activation by staphylococcal exotoxins. *Infect Immun* 59(11): 4049–55.
35. Arnold R, Brenner D, Becker M, Frey CR, Krammer PH (2006) How T lymphocytes switch between life and death. *Eur J Immunol* 36(7): 1654–8.
36. Dhein J, Walczak H, Bäuml C, Debatin KM, Krammer PH (1995) Autocrine T-cell suicide mediated by APO-1/(Fas/CD95). *Nature* 373(6513): 438–41.
37. Barnhart BC, Alappat EC, Peter ME (2003) The CD95 type I/type II model. *Semin Immunol* 15(3): 185–93.
38. Sundberg EJ, Li Y, Mariuzza RA (2002) So many ways of getting in the way: diversity in the molecular architecture of superantigen-dependent T-cell signaling complexes. *Current Opinion in Immunology* 14: 36–44.
39. Hildeman DA, Zhu Y, Mitchell TC, Bouillet P, Strasser A, et al. (2002) Activated T cell death *in vivo* mediated by proapoptotic bcl-2 family member bim. *Immunity* 16(6): 759–67.
40. Brenner D, Krammer PH, Arnold R (2008) Concepts of activated T cell death. *Crit Rev Oncol Hematol* 66(1): 52–64.
41. Hildeman DA, Mitchell T, Teague TK, Henson P, Day BJ, et al. (1999) Reactive oxygen species regulate activation-induced T cell apoptosis. *Immunity* 10(6): 735–44.
42. Ettinger R, Panka DJ, Wang JK, Stanger BZ, Ju ST, et al. (1995) Fas ligand-mediated cytotoxicity is directly responsible for apoptosis of normal CD4+ T cells responding to a bacterial superantigen. *J Immunol* 154(9): 4302–8.
43. Renno T, Hahne M, Tschopp J, MacDonald HR (1996) Peripheral T cells undergoing superantigen-induced apoptosis *in vivo* express B220 and upregulate Fas and Fas ligand. *J Exp Med* 183(2): 431–7.
44. Metzger R, Melmer G, Schondelmaier S, Heckl-Ostreicher B, Nerl C, et al. (1993) Leukaemic T cells from patients with chronic lymphocytic leukemia of T-cell origin respond to Staphylococcus aureus enterotoxin Superantigens. *Scand J Immunol* 37: 245–50.
45. Ogata M, Kikuchi H, Ohtsuka E, Kohno K, Ito M, et al. (1998) Stimulation of leukaemic cells from adult T-cell leukaemia patients with bacterial superantigens. *Br J Haematol* 100(3): 490–500.
46. Tokura Y, Heald PW, Yan SL, Edelson RL (1992) Stimulation of cutaneous T-cell lymphoma cells with superantigenic staphylococcal toxins. *J Invest Dermatol* 98(1): 33–7.
47. Jackow CM, Cather JC, Hearne V, Asano AT, Musser JM, et al. (1997) Association of erythrodermic cutaneous T-cell lymphoma, superantigen-positive Staphylococcus aureus, and oligoclonal T-cell receptor V $\beta$  gene expansion. *Blood* 89(1): 32–40.
48. Linnemann T, Gellrich S, Lukowsky A, Mielke A, Audring H, et al. (2004) Polyclonal expansion of T cells with the TCR V $\beta$  type of the tumour cell in lesions of cutaneous T-cell lymphoma: evidence for possible superantigen involvement. *Br J Dermatol* 150(5): 1013–7.
49. Vonderheid EC, Boselli CM, Conroy M, Casaus L, Espinoza LC, et al. (2005) Evidence for restricted V $\beta$  usage in the leukemic phase of cutaneous T cell lymphoma. *J Invest Dermatol* 124(3): 651–61.
50. Alber G, Hammer DK, Fleischer B (1990) Relationship between enterotoxigenic and T lymphocyte-stimulating activity of staphylococcal enterotoxin. *B J Immunol* 144(12): 4501–6.
